# Supplementary material
Source: PubMed Central journal article supplement (PMC3093882)
Supplement: supp_M111.221184_Sup_Figs_6207.pdf [file supp_M111.221184_Sup_Figs_6207.pdf]

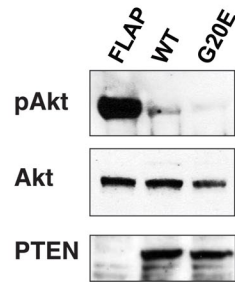

**Fig. S1. PTEN G20E mutant has a lipid phosphatase activity.** FLAP, PTEN WT, and G20E plasmids were co-transfected with ECFP Akt plasmid to U87 MG cells. The cell lysates were immunoblotted with antibodies against Flag, pAKT and AKT.

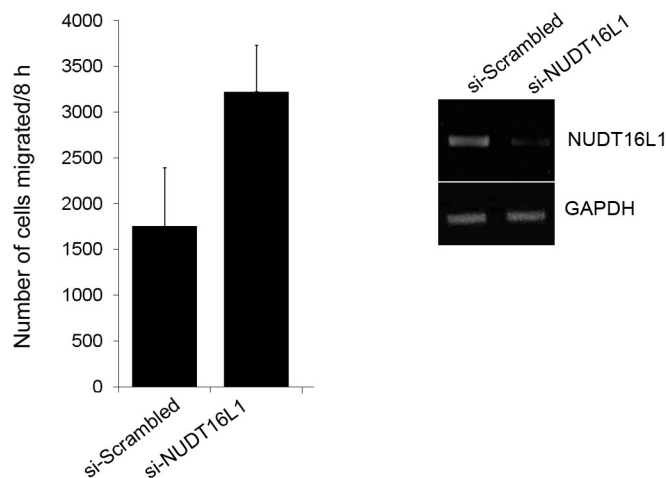

**Fig. S2. NUDT16L1 is required to control cell migration in LN229 cells that endogenously express PTEN.** A transwell migration assay was performed using LN229 cell lines. Number of cells migrated were assayed under specific siRNA to NUDT16L1 (si-NUDT16) in comparison to scrambled siRNA (si-Scrambled) as shown. Right panel shows RT-PCR for NUDT16L1 transcripts with NUDT16L1 (si-NUDT16L1) and non target scrambled siRNA (si-Scrambled).

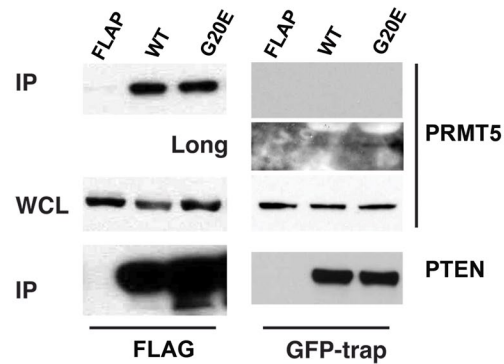

**Fig. S3. Interaction between PTEN and PRMT5.** Cell extracts from U87 FLAP, PTEN WT, and G20E cells were incubated with either Flag-beads or GFP-trap and precipitates were analyzed with anti-PRMT5 and Flag antibodies.
